# Supplementary material for: Interrogating the Role of the Two Distinct Fructose-Bisphosphate Aldolases of Bacillus methanolicus by Site-Directed Mutagenesis of Key Amino Acids and Gene Repression by CRISPR Interference
Source: PubMed Central journal article supplement (PMC8119897; doi:10.3389/fmicb.2021.669220), 2021-04-30
Supplement: Data_Sheet_1.pdf [file Data_Sheet_1.pdf]

## Supplementary Material

# Interrogating the Role of the Two Distinct Fructose-Bisphosphate Aldolases of *Bacillus methanolicus* by Site-Directed Mutagenesis of Key Amino Acids and Gene Repression by CRISPR Interference

Kerstin Schultenkämper<sup>1</sup>, Desirée D. Gütle<sup>2</sup>, Marina Gil López<sup>†</sup>, Laura B. Keller<sup>1</sup>, Lin Zhang<sup>3</sup>  
Oliver Einsle<sup>3</sup>, Jean-Pierre Jacquot<sup>2</sup> and Volker F. Wendisch<sup>1\*</sup>

<sup>1</sup> Genetics of Prokaryotes, Faculty of Biology & CeBiTec, Bielefeld University, 33615 Bielefeld, Germany

<sup>2</sup> Univ Lorraine, INRAE, IAM, F-54000 Nancy, France

<sup>3</sup> Institute for Biochemistry, Albert-Ludwigs-University Freiburg, 79104 Freiburg, Germany

**\* Correspondence:**

Volker F. Wendisch

volker.wendisch@uni-bielefeld.de

<sup>†</sup> Present address: Marina Gil López, Department of Biotechnology and Food Science, Norwegian University of Science and Technology (NTNU), Trondheim, Norway

## Supplementary tables

**Table S1: Bacterial strains and plasmids used in this study.**

| Strain                                         | Relevant characteristics                                                                                                                                                                                                                                                    | Reference                     |
|------------------------------------------------|-----------------------------------------------------------------------------------------------------------------------------------------------------------------------------------------------------------------------------------------------------------------------------|-------------------------------|
| <i>Escherichia coli</i><br>DH5 $\alpha$        | General cloning host, F- <i>thi-1 endA1</i><br><i>hsdR17</i> (r, m) <i>supE44 lacU169</i><br>(80 <i>lacZ_M15</i> ) <i>recA1 gyrA96 relA1</i>                                                                                                                                | (Hanahan, 1983)               |
| <i>Escherichia coli</i><br>BL21 (DE3)          | Protein production host, F- <i>ompT hsdSB</i><br>( <i>r<sub>B</sub><sup>-</sup> m<sub>B</sub><sup>-</sup></i> ) <i>gal dcm</i> (DE3)                                                                                                                                        | (Studier and Moffatt, 1986)   |
| <i>Bacillus</i><br><i>methanolicus</i><br>MGA3 | Wild type strain (ATCC 53907)                                                                                                                                                                                                                                               | (Schendel et al., 1990)       |
| Plasmid                                        |                                                                                                                                                                                                                                                                             |                               |
| pET16b                                         | Ap <sup>R</sup> ; T7 <i>lac</i> ; pBR322 origin, vector for N-terminal His-tagged protein overproduction                                                                                                                                                                    | Novagen                       |
| pET16b- <i>fba<sup>C</sup></i>                 | Ap <sup>R</sup> ; T7 <i>lac</i> ; pBR322 origin, <i>fba<sup>C</sup></i> sequence was inserted in <i>NdeI</i> CA <sup>^</sup> TATG cloning site                                                                                                                              | (Stolzenberger et al., 2013a) |
| pET16b- <i>fba<sup>P</sup></i>                 | Ap <sup>R</sup> ; T7 <i>lac</i> ; pBR322 origin, <i>fba<sup>P</sup></i> sequence was inserted in <i>NdeI</i> CA <sup>^</sup> TATG cloning site                                                                                                                              | (Stolzenberger et al., 2013a) |
| pET16b- <i>glpX<sup>C</sup></i>                | Ap <sup>R</sup> ; T7 <i>lac</i> ; pBR322 origin, <i>glpX<sup>C</sup></i> sequence from <i>B. methanolicus</i> was inserted in <i>NdeI</i> CA <sup>^</sup> TATG cloning site                                                                                                 | (Stolzenberger et al., 2013a) |
| pET16b- <i>fba<sup>C</sup>-sdm1</i>            | pET16b derivative for the production of <i>B. methanolicus</i> His <sub>10</sub> -tagged Fba <sup>C</sup> E51V mutant from <i>E. coli</i> BL21 (DE3), Ap <sup>R</sup> ; T7 <i>lac</i> ; pBR322 origin SDM of <i>fba<sup>C</sup></i> E51V                                    | This study                    |
| pET16b- <i>fba<sup>C</sup>-sdm2</i>            | pET16b derivative for the production of <i>B. methanolicus</i> His <sub>10</sub> -tagged Fba <sup>C</sup> T140R mutant from <i>E. coli</i> BL21 (DE3), Ap <sup>R</sup> ; T7 <i>lac</i> ; pBR322 origin, SDM of <i>fba<sup>C</sup></i> T140R                                 | This study                    |
| pET16b- <i>fba<sup>C</sup>-sdm5</i>            | pET16b derivative for the production of <i>B. methanolicus</i> His <sub>10</sub> -tagged Fba <sup>C</sup> E51V/T140R mutant from <i>E. coli</i> BL21 (DE3), Ap <sup>R</sup> ; T7 <i>lac</i> ; pBR322 origin, SDM of <i>fba<sup>C</sup></i> E51V/T140R                       | This study                    |
| pET16b- <i>fba<sup>P</sup>-sdm3</i>            | pET16b derivative for the production of <i>B. methanolicus</i> His <sub>10</sub> -tagged Fba <sup>P</sup> V51E mutant from <i>E. coli</i> BL21 (DE3), Ap <sup>R</sup> ; T7 <i>lac</i> ; pBR322 origin, SDM of <i>fba<sup>P</sup></i> V51E                                   | This study                    |
| pET16b- <i>fba<sup>P</sup>-sdm4</i>            | pET16b derivative for the production of <i>B. methanolicus</i> His <sub>10</sub> -tagged Fba <sup>P</sup> R140T mutant from <i>E. coli</i> BL21 (DE3), Ap <sup>R</sup> ; T7 <i>lac</i> ; pBR322 origin, SDM of <i>fba<sup>P</sup></i> R140T                                 | This study                    |
| pET16b- <i>fba<sup>P</sup>-sdm6</i>            | pET16b derivative for the production of <i>B. methanolicus</i> His <sub>10</sub> -tagged Fba <sup>P</sup> V51E/R140T mutant from <i>E. coli</i> BL21 (DE3), Ap <sup>R</sup> ; T7 <i>lac</i> ; pBR322 origin, SDM of <i>fba<sup>P</sup></i> V51E/R140T                       | This study                    |
| pET28a- <i>glpX</i>                            | pET28a derivative for the production of <i>C. glutamicum</i> His-tagged GlpX from <i>E. coli</i> BL21 (DE3), Knt <sup>R</sup> ; T7 <i>lac</i> ; pBR322 origin, <i>glpX</i> sequence from <i>C. glutamicum</i> was inserted in <i>NdeI</i> CA <sup>^</sup> TATG cloning site | (Rittmann et al., 2003)       |

|                                 |                                                                                                                                                                                                                                                                                                                       |                               |
|---------------------------------|-----------------------------------------------------------------------------------------------------------------------------------------------------------------------------------------------------------------------------------------------------------------------------------------------------------------------|-------------------------------|
| pNW33Nkan                       | Cm <sup>R</sup> , Km <sup>R</sup> ; pNW33N derivative in which the kanamycin-resistance gene was inserted                                                                                                                                                                                                             | (Irla et al., 2016)           |
| piCas                           | Cm <sup>R</sup> , Km <sup>R</sup> ; pNW33N derivative, m2p controlled expression of <i>dcas9</i> , followed by terminator sequence of <i>S. pyogenes</i> . Contains another m2p promoter, which lacks 5'UTR, followed by <i>AvaI/XbaI</i> cloning site and dCas9 handle and terminator sequence of <i>S. pyogenes</i> | (Schultenkämper et al., 2019) |
| piCas- <i>tfba</i> <sup>C</sup> | Cm <sup>R</sup> , Km <sup>R</sup> ; piCas derivative, 20 bp complementary to <i>tfba</i> <sup>C</sup> gene was inserted in <i>AvaI/XbaI</i> cloning site.                                                                                                                                                             | This study                    |
| piCas- <i>tfba</i> <sup>P</sup> | Cm <sup>R</sup> , Km <sup>R</sup> ; piCas derivative, 20 bp complementary to <i>tfba</i> <sup>P</sup> gene was inserted in <i>AvaI/XbaI</i> cloning site.                                                                                                                                                             | This study                    |
| piCas- <i>tkt</i> <sup>C</sup>  | Cm <sup>R</sup> , Km <sup>R</sup> ; piCas derivative, 20 bp complementary to <i>tkt</i> <sup>C</sup> gene was inserted in <i>AvaI/XbaI</i> cloning site.                                                                                                                                                              | This study                    |
| piCas- <i>tkt</i> <sup>P</sup>  | Cm <sup>R</sup> , Km <sup>R</sup> ; piCas derivative, 20 bp complementary to <i>tkt</i> <sup>P</sup> gene was inserted in <i>AvaI/XbaI</i> cloning site.                                                                                                                                                              | This study                    |

Cm<sup>R</sup>, chloramphenicol resistance; Km<sup>R</sup>, kanamycin resistance; Ap<sup>R</sup>, ampicillin resistance;

**Table S2: Oligonucleotide sequences used in the present study.**

| Oligonucleotide ID | Characteristic                                                                                                                                                         | Sequence [5'-3']                                                                 |
|--------------------|------------------------------------------------------------------------------------------------------------------------------------------------------------------------|----------------------------------------------------------------------------------|
| tfbaC_fwd          | Fwd primer for annealing oligonucleotides and synthesizing 20 bp region complementary to <i>tfba</i> <sup>C</sup> as target for CRISPRi with overlaps to piCas plasmid | <i>aaacgttttatgataaatataata</i><br><i>tctgccccagctctt</i>                        |
| tfbaC_rev          | Rev primer for annealing oligonucleotides and synthesizing 20 bp region complementary to <i>tfba</i> <sup>C</sup> as target for CRISPRi with overlaps to piCas plasmid | <i>ttctagctctaaaactcgaaaag</i><br><i>agctgggggcagatatt</i>                       |
| tfbaP_fwd          | Fwd primer for annealing oligonucleotides and synthesizing 20 bp region complementary to <i>tfba</i> <sup>P</sup> as target for CRISPRi with overlaps to piCas plasmid | <i>aaacgttttatgataaatatccat</i><br><i>ggacagaacctaacgc</i>                       |
| tfbaP_rev          | Rev primer for annealing oligonucleotides and synthesizing 20 bp region complementary to <i>tfba</i> <sup>P</sup> as target for CRISPRi with overlaps to piCas plasmid | <i>ttctagctctaaaactcgagcgt</i><br><i>taggttctgtccatgg</i>                        |
| tktC_fwd           | Fwd primer for annealing oligonucleotides and synthesizing 20 bp region complementary to <i>tkt</i> <sup>C</sup> as target for CRISPRi with overlaps to piCas plasmid  | <i>aaacgttttatgataaatatgatg</i><br><i>gaaagtgtacgtatcg</i>                       |
| tktC_rev           | Rev primer for annealing oligonucleotides and synthesizing 20 bp region complementary to <i>tkt</i> <sup>C</sup> as target for CRISPRi with overlaps to piCas plasmid  | <i>ttctagctctaaaactcgacgat</i><br><i>acgtacactttccatc</i>                        |
| tktP_fwd           | Fwd primer for annealing oligonucleotides and synthesizing 20 bp region complementary to <i>tkt</i> <sup>P</sup> as target for CRISPRi with overlaps to piCas plasmid  | <i>aaacgttttatgataaatatgatc</i><br><i>aatatctatTTTTGT</i>                        |
| tktP_rev           | Rev primer for annealing oligonucleotides and synthesizing 20 bp region complementary to <i>tkt</i> <sup>P</sup> as target for CRISPRi with overlaps to piCas plasmid  | <i>aaacgttttatgataaatatgatc</i><br><i>aatatctatTTTTGT</i>                        |
| proI_fwd           | Fwd primer for amplifying <i>proI</i> of <i>Bacillus methanolicus</i> , quality check for contaminating genomic DNA in RNA samples                                     | <i>caaggccgcttgaaaaggggga</i><br><i>aatgacaaatgaagaagcttactt</i><br><i>ttgtc</i> |
| proI_rvs           | Rev primer for amplifying <i>proI</i> of <i>Bacillus methanolicus</i> , quality check for contaminating genomic DNA in RNA samples                                     | <i>gcgggccgcggtaccggggg</i><br><i>atccttactgcttactgttactg</i>                    |
| parA_fwd           | qRT-PCR fwd primer for analysis for <i>parA</i> expression                                                                                                             | <i>tccagcctgaaggatatagc</i>                                                      |
| parA_rev           | qRT-PCR rev primer for analysis for <i>parA</i> expression                                                                                                             | <i>tcttcggcactgttgaagga</i>                                                      |
| fbaC_fwd           | qRT-PCR fwd primer for analysis for <i>fba</i> <sup>C</sup> expression                                                                                                 | <i>agccgttcagtctgttttc</i>                                                       |

|           |                                                                                                                         |                            |
|-----------|-------------------------------------------------------------------------------------------------------------------------|----------------------------|
| fbaC_rev  | qRT-PCR rev primer for analysis for <i>fba<sup>C</sup></i> expression                                                   | catccccatttatcacattcc      |
| fbaP_fwd  | qRT-PCR fwd primer for analysis for <i>fba<sup>P</sup></i> expression                                                   | cggtggacaagaagatgatgtag    |
| fbaP_rev  | qRT-PCR rev primer for analysis for <i>fba<sup>P</sup></i> expression                                                   | acgcaggtgcaaagcag          |
| dCas9_fwd | qRT-PCR fwd primer for analysis for <i>dcas9</i> expression                                                             | cgtcgccgttatactgggtg       |
| dCas9_rev | qRT-PCR rev primer for analysis for <i>dcas9</i> expression                                                             | ctatcgccttgccagacac        |
| tktC_fwd  | qRT-PCR fwd primer for analysis for <i>tkt<sup>C</sup></i> expression                                                   | gagaagacggaccaacacac       |
| tktC_rev  | qRT-PCR rev primer for analysis for <i>tkt<sup>C</sup></i> expression                                                   | taggagcaacgcatcaggag       |
| tktP_fwd  | qRT-PCR fwd primer for analysis for <i>tkt<sup>P</sup></i> expression                                                   | aaagaagcagcagagaagaag      |
| tktP_rev  | qRT-PCR rev primer for analysis for <i>tkt<sup>P</sup></i> expression                                                   | cgacacggtaaacaggaac        |
| SDM1_fwd  | Backbone amplification of pET16b- <i>fba<sup>C</sup></i> with a mutation in position 51 from E to V (SDM1), fwd primer  | tcattttaggagtttctgtggggcgc |
| SDM1_rev  | Backbone amplification of pET16b- <i>fba<sup>C</sup></i> with a mutation in position 51 from E to V (SDM1), rev primer  | catatagcggccggcgcccaca     |
| SDM2_fwd  | Backbone amplification of pET16b- <i>fba<sup>C</sup></i> with a mutation in position 140 from T to R (SDM2), fwd primer | aagcagagcttgacgcgttg       |
| SDM2_rev  | Backbone amplification of pET16b- <i>fba<sup>C</sup></i> with a mutation in position 140 from T to R (SDM2), rev primer | tcttgccccaacgcgtccaag      |
| SDM3_fwd  | Backbone amplification of pET16b- <i>fba<sup>P</sup></i> with a mutation in position 51 from V to E (SDM 3), fwd primer | gttattatcggggtatctgaaggt   |
| SDM3_rev  | Backbone amplification of pET16b- <i>fba<sup>P</sup></i> with a mutation in position 51 from V to E (SDM 3), rev primer | catgtaattagcagcaccttcaga   |
| SDM4_fwd  | Backbone amplification of pET16b- <i>fba<sup>P</sup></i> with a mutation in position 140 from R to T (SDM4), fwd primer | ggcagagctaggtaccatcggt     |
| SDM4_rev  | Backbone amplification of pET16b- <i>fba<sup>P</sup></i> with a mutation in position 140 from R to T (SDM4), rev primer | ctgtccaccgatggtacctagct    |
| P212      | Sequencing primer of pET16a plasmids (fwd)                                                                              | gctaacgcagtcaggcaccgtgta   |
| P213      | Sequencing primer of pET16a plasmids (rev)                                                                              | gactcactataggggaattgtgagcg |

Overlapping regions are shown in italics; fwd: forward; rev: reverse; SDM: site directed mutagenesis.

**Table S3: SDMs characteristics.**

| Name                          | Performed mutation(s)  | Primer pair           | Template                       | Relevant characteristics      |
|-------------------------------|------------------------|-----------------------|--------------------------------|-------------------------------|
| <b>FBA<sup>C</sup>; E51V</b>  | FBA <sup>C</sup> E51V  | SDM1_fwd/<br>SDM2_rev | pET16b- <i>fba<sup>C</sup></i> | Mutation in FBP binding site  |
| <b>FBA<sup>C</sup>; T140R</b> | FBA <sup>C</sup> T140R | SDM2_fwd/<br>SDM2_rev | pET16b- <i>fba<sup>C</sup></i> | Mutation in Zinc binding site |
| <b>FBA<sup>P</sup>; V51E</b>  | FBA <sup>P</sup> V51E  | SDM3_fwd/<br>SDM3_rev | pET16b- <i>fba<sup>P</sup></i> | Mutation in FBP binding site  |

|                                     |                                |                       |                                                  |                                                       |
|-------------------------------------|--------------------------------|-----------------------|--------------------------------------------------|-------------------------------------------------------|
| <b>FBA<sup>P</sup>; R140T</b>       | FBA <sup>P</sup> R140T         | SDM4_fwd/<br>SDM4_rev | pET16b- <i>fba</i> <sup>P</sup>                  | Mutation in Zinc binding site                         |
| <b>FBA<sup>C</sup>; E51V,T40R</b>   | FBA <sup>C</sup><br>E51V/T140R | SDM2_fwd/<br>SDM2_rev | pET16b- <i>fba</i> <sup>C</sup> -<br><i>sdm1</i> | Mutation in FBP and Zinc binding site (Double mutant) |
| <b>FBA<sup>P</sup>; V51E, R140T</b> | FBA <sup>P</sup><br>V51E/R140T | SDM3_fwd/<br>SDM3_rev | pET16b- <i>fba</i> <sup>P</sup> -<br><i>sdm4</i> | Mutation in FBP and Zinc binding site (Double mutant) |

**Table S4: Amino acid sequences of FBA<sup>C/P</sup> and SDMs.**

| Name                                    | Sequence                                                                                                                                                                                                                                                                                                                         |
|-----------------------------------------|----------------------------------------------------------------------------------------------------------------------------------------------------------------------------------------------------------------------------------------------------------------------------------------------------------------------------------|
| <b>FBA<sup>C</sup></b>                  | MPLVSMTEMLNKAKAEGYAVGQFNLNLEFTQAILLAAEEEEKSPVILGVS <b>E</b> GAGRY<br>MGGFKTVVNMVKGLMEDYKITVPVAIHLDHGSSFEKCKEVIDAGFTSVMIDASHHPF<br>EENVEVTKKVVEYAHARGVSVEAELG <b>T</b> VGGQEDDVIADGVYADPKECEELVKRTGI<br>DCLAPALGSVHGPKGEPNLGFKEMEEIGRITGVPLVLHGGTGIPTKDIQRAISLGTAK<br>INVNTENQIASAKKVREVLAEENPNMYDPRKYLGPARDAIKETVIGKMREFGSSGKA   |
| <b>FBA<sup>C</sup>; E51V</b>            | MPLVSMTEMLNKAKAEGYAVGQFNLNLEFTQAILLAAEEEEKSPVILGVS <b>V</b> GAGRY<br>MGGFKTVVNMVKGLMEDYKITVPVAIHLDHGSSFEKCKEVIDAGFTSVMIDASHHPF<br>EENVEVTKKVVEYAHARGVSVEAELG <b>T</b> VGGQEDDVIADGVYADPKECEELVKRTGI<br>DCLAPALGSVHGPKGEPNLGFKEMEEIGRITGVPLVLHGGTGIPTKDIQRAISLGTAK<br>INVNTENQIASAKKVREVLAEENPNMYDPRKYLGPARDAIKETVIGKMREFGSSGKA   |
| <b>FBA<sup>C</sup>; T140R</b>           | MPLVSMTEMLNKAKAEGYAVGQFNLNLEFTQAILLAAEEEEKSPVILGVS <b>E</b> GAGRY<br>MGGFKTVVNMVKGLMEDYKITVPVAIHLDHGSSFEKCKEVIDAGFTSVMIDASHHPF<br>EENVEVTKKVVEYAHARGVSVEAELG <b>R</b> VGGQEDDVIADGVYADPKECEELVKRTGI<br>IDCLAPALGSVHGPKGEPNLGFKEMEEIGRITGVPLVLHGGTGIPTKDIQRAISLGTAK<br>KINVNTENQIASAKKVREVLAEENPNMYDPRKYLGPARDAIKETVIGKMREFGSSGKA |
| <b>FBA<sup>C</sup>;<br/>E51V,T140R</b>  | MPLVSMTEMLNKAKAEGYAVGQFNLNLEFTQAILLAAEEEEKSPVILGVS <b>V</b> GAGRY<br>MGGFKTVVNMVKGLMEDYKITVPVAIHLDHGSSFEKCKEVIDAGFTSVMIDASHHPF<br>EENVEVTKKVVEYAHARGVSVEAELG <b>R</b> VGGQEDDVIADGVYADPKECEELVKRTGI<br>IDCLAPALGSVHGPKGEPNLGFKEMEEIGRITGVPLVLHGGTGIPTKDIQRAISLGTAK<br>KINVNTENQIASAKKVREVLAEENPNMYDPRKYLGPARDAIKETVIGKMREFGSSGKA |
| <b>FBA<sup>P</sup></b>                  | MPLVSMKMDMLNHGKENGAYAVGQFNINLEFGQAILQAEEEEKSPVIIGVS <b>V</b> GAAANY<br>MGGFKLIVDMVKSSMDSYNVTPVAIHLDHGPSLEKCVQAIHAGFTSVMIDGSHLPL<br>EENIELTKRVVEIAHSVGSVEAELG <b>R</b> IGGGQEDDVVAESFYAIPSECEQLVRETGVDCFP<br>APALGSVHGPKGEPKLGFDPMEEIMKLTGVPLVLHGGTGIPTKDIQKAIKISLGTAKIN<br>VNTESQIAATKAVREVLNDAKLFDPKFLAPAREAIKETIKGKMREFGSSGKA  |
| <b>FBA<sup>P</sup>; V51E</b>            | MPLVSMKMDMLNHGKENGAYAVGQFNINLEFGQAILQAEEEEKSPVIIGVS <b>E</b> GAAANY<br>MGGFKLIVDMVKSSMDSYNVTPVAIHLDHGPSLEKCVQAIHAGFTSVMIDGSHLPL<br>EENIELTKRVVEIAHSVGSVEAELG <b>R</b> IGGGQEDDVVAESFYAIPSECEQLVRETGVDCFP<br>APALGSVHGPKGEPKLGFDPMEEIMKLTGVPLVLHGGTGIPTKDIQKAIKISLGTAKIN<br>VNTESQIAATKAVREVLNDAKLFDPKFLAPAREAIKETIKGKMREFGSSGKA  |
| <b>FBA<sup>P</sup>; R140T</b>           | MPLVSMKMDMLNHGKENGAYAVGQFNINLEFGQAILQAEEEEKSPVIIGVS <b>V</b> GAAANY<br>MGGFKLIVDMVKSSMDSYNVTPVAIHLDHGPSLEKCVQAIHAGFTSVMIDGSHLPL<br>EENIELTKRVVEIAHSVGSVEAELG <b>T</b> IGGGQEDDVVAESFYAIPSECEQLVRETGVDCFP<br>APALGSVHGPKGEPKLGFDPMEEIMKLTGVPLVLHGGTGIPTKDIQKAIKISLGTAKIN<br>VNTESQIAATKAVREVLNDAKLFDPKFLAPAREAIKETIKGKMREFGSSGKA  |
| <b>FBA<sup>P</sup>; V51E,<br/>R140T</b> | MPLVSMKMDMLNHGKENGAYAVGQFNINLEFGQAILQAEEEEKSPVIIGVS <b>E</b> GAAANY<br>MGGFKLIVDMVKSSMDSYNVTPVAIHLDHGPSLEKCVQAIHAGFTSVMIDGSHLPL<br>EENIELTKRVVEIAHSVGSVEAELG <b>T</b> IGGGQEDDVVAESFYAIPSECEQLVRETGVDCFP<br>APALGSVHGPKGEPKLGFDPMEEIMKLTGVPLVLHGGTGIPTKDIQKAIKISLGTAKIN<br>VNTESQIAATKAVREVLNDAKLFDPKFLAPAREAIKETIKGKMREFGSSGKA  |

Amino acid positions 51 and 140 are highlighted in red.

**Table S5: X-ray data collection and refinement statistics.**

| Data sets                                      | FBA <sup>C</sup>           | FBA <sup>P</sup>                   |                                     |
|------------------------------------------------|----------------------------|------------------------------------|-------------------------------------|
| PDB accession code                             | 7NC7                       | 7NCC                               |                                     |
| Space group                                    | C 2 2 2 <sub>1</sub>       | C 2 2 2 <sub>1</sub>               |                                     |
| Cell constants                                 | a, b, c [Å]<br>α, β, γ [°] | 71.97, 98.26, 139.37<br>90, 90, 90 | 91.58, 122.12, 160.96<br>90, 90, 90 |
| Wavelength [Å]                                 | 1.54                       | 1                                  |                                     |
| Resolution limits [Å]                          | 27.41 – 2.20 (2.28 – 2.20) | 45.79 – 2.00 (2.05 – 2.00)         |                                     |
| Completeness (%)                               | 99.8 (98.0)                | 99.3 (99.4)                        |                                     |
| Unique reflections                             | 24421 (2158)               | 60641 (4427)                       |                                     |
| Multiplicity (%)                               | 4.1 (4.2)                  | 13.4 (13.7)                        |                                     |
| $R_{\text{merge}}^{\text{a}}$                  | 0.395 (1.006)              | 0.156 (0.925)                      |                                     |
| $R_{\text{p.i.m.}}$                            | 0.229 (0.551)              | 0.044 (0.256)                      |                                     |
| Mean $I/\sigma$ (I)                            | 6.7 (1.7)                  | 11.7 (3.0)                         |                                     |
| $\text{CC}_{1/2}$                              | 0.996 (0.521)              | 0.999 (0.661)                      |                                     |
| <b>Refinement statistics</b>                   |                            |                                    |                                     |
| $R_{\text{work}}^{\text{b}} / R_{\text{free}}$ | 0.192 / 0.248              | 0.194 / 0.258                      |                                     |
| No. atoms                                      | 4324                       | 4614                               |                                     |
| Protein                                        | 4155                       | 4288                               |                                     |
| Ligand/ion                                     | 20                         | 44                                 |                                     |
| Water                                          | 149                        | 282                                |                                     |
| B-factor [Å <sup>2</sup> ]                     | 39.13                      | 38.72                              |                                     |
| Protein                                        | 39.12                      | 38.26                              |                                     |
| Ligand/ion                                     | 65.05                      | 47.25                              |                                     |
| Water                                          | 36.07                      | 44.39                              |                                     |
| R.m.s. deviations                              |                            |                                    |                                     |
| bond lengths [Å]                               | 0.014                      | 0.018                              |                                     |
| bond angles [°]                                | 1.66                       | 2.13                               |                                     |
| Ramachandran plot                              |                            |                                    |                                     |
| Favored (%)                                    | 96.81                      | 96.63                              |                                     |
| Allowed (%)                                    | 3.19                       | 3.37                               |                                     |
| Outliers (%)                                   | 0                          | 0                                  |                                     |

<sup>a</sup>  $R_{\text{merge}} = \sum_{hkl} [(\sum_i |I_i - \langle I \rangle) / \sum_i I_i]$

<sup>b</sup>  $R_{\text{work}} = \sum_{hkl} ||F_{\text{obs}}| - |F_{\text{calc}}|| / \sum_{hkl} |F_{\text{obs}}|$

 $R_{\text{free}}$  is the cross-validation  $R$  value for a test set of 5 % of unique reflections

## Supplementary figures

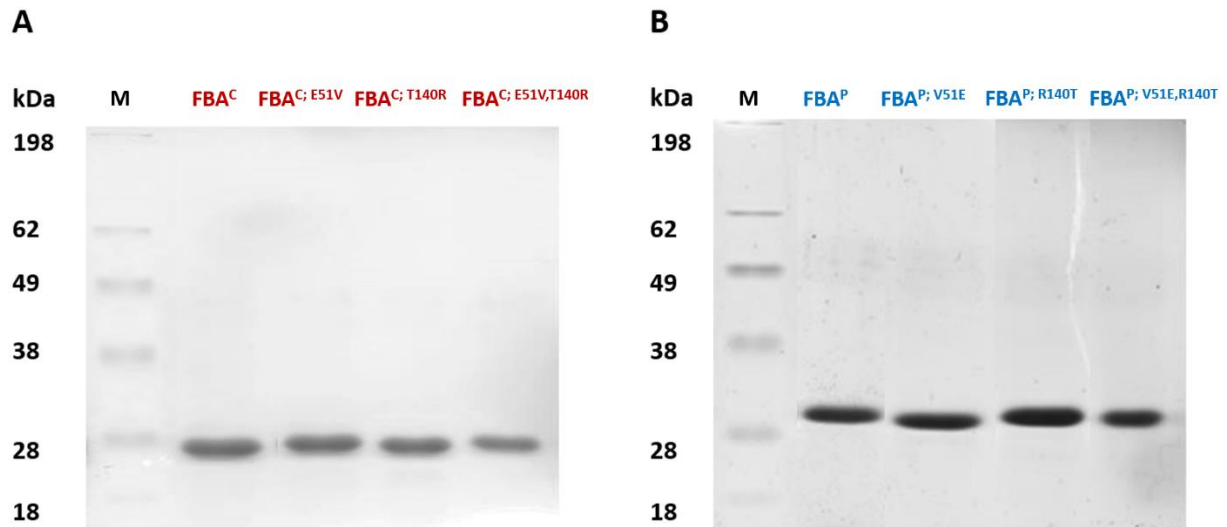

**Fig. S1: Purification of distinct FBAs and mutants.** SDS gels showing the purified FBA<sup>C</sup> with mutants FBA<sup>C</sup>; E51V, FBA<sup>C</sup>; T140R and FBA<sup>C</sup>; E51V,T140R (A), FBA<sup>P</sup> with FBA<sup>P</sup>; V51E, FBA<sup>P</sup>; R140T and FBA<sup>P</sup>; V51E, R140T (B) after His-Tag cleavage. Additionally, SeeBlue<sup>TM</sup> pre-stained protein standard (Thermo Fisher Scientific), was applied as marker (M).

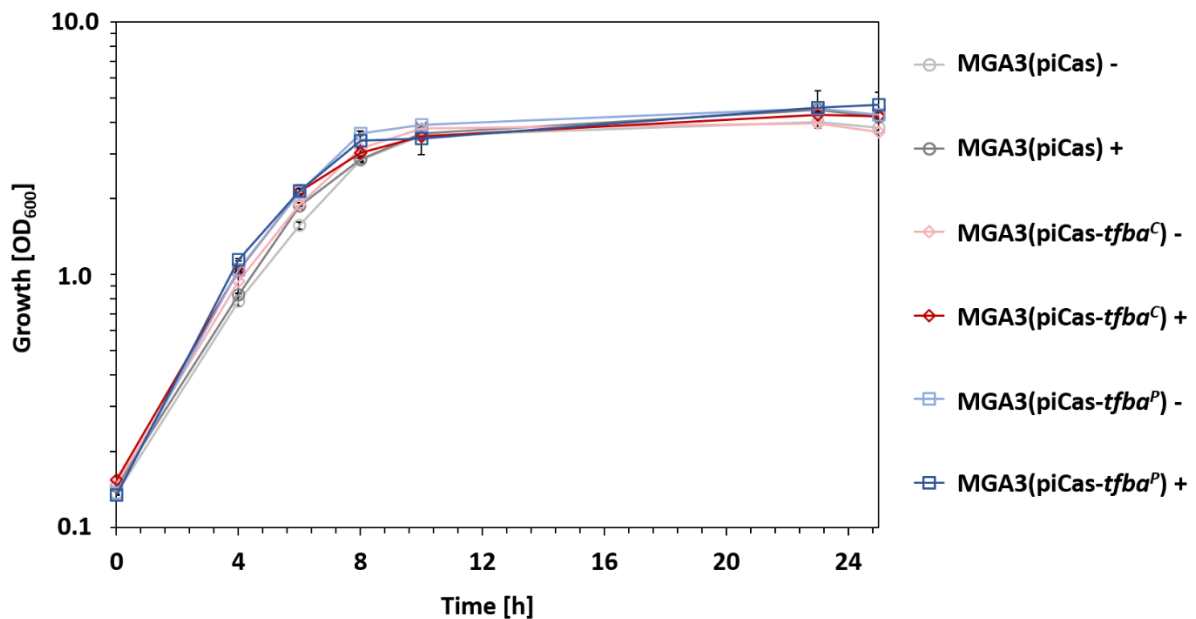

**Fig. S2: Growth of *B. methanolicus* MGA3 (piCas-*tfba*<sup>C/P</sup>) strains.** Cultivation was performed with methanol as sole carbon source (-) and additionally with mannitol for *dCas9* induction (+). Error bars indicating standard deviations (n=3)

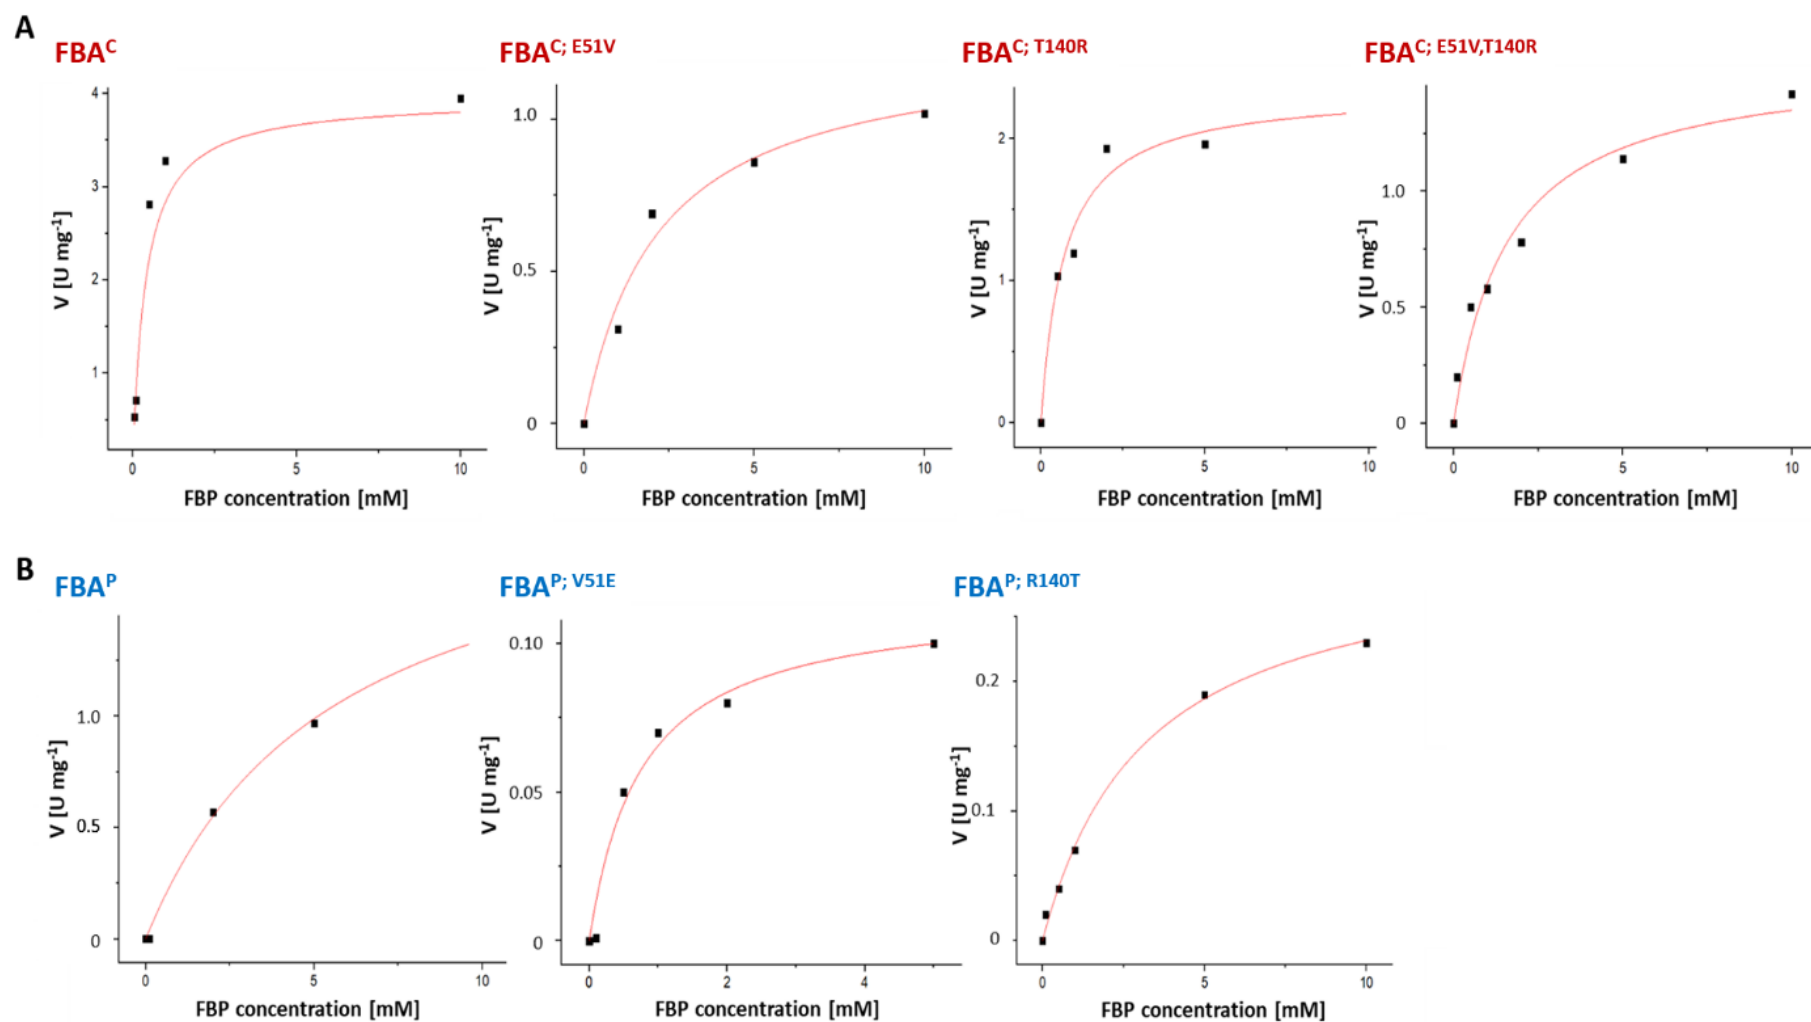

**Fig. S3: Michaelis Menten Plots to determine  $K_M$  for distinct FBAs and mutants in glycolysis (FBP cleavage).** The specific activity (axis of ordinate) for FBA<sup>C</sup> and SDMs (A) and FBA<sup>P</sup> and SDMs (B) were applied against the FBP substrate concentration (axis of abscissa). The kinetic parameters were calculated according to Michaelis Menten kinetics (Michaelis et al., 2011).



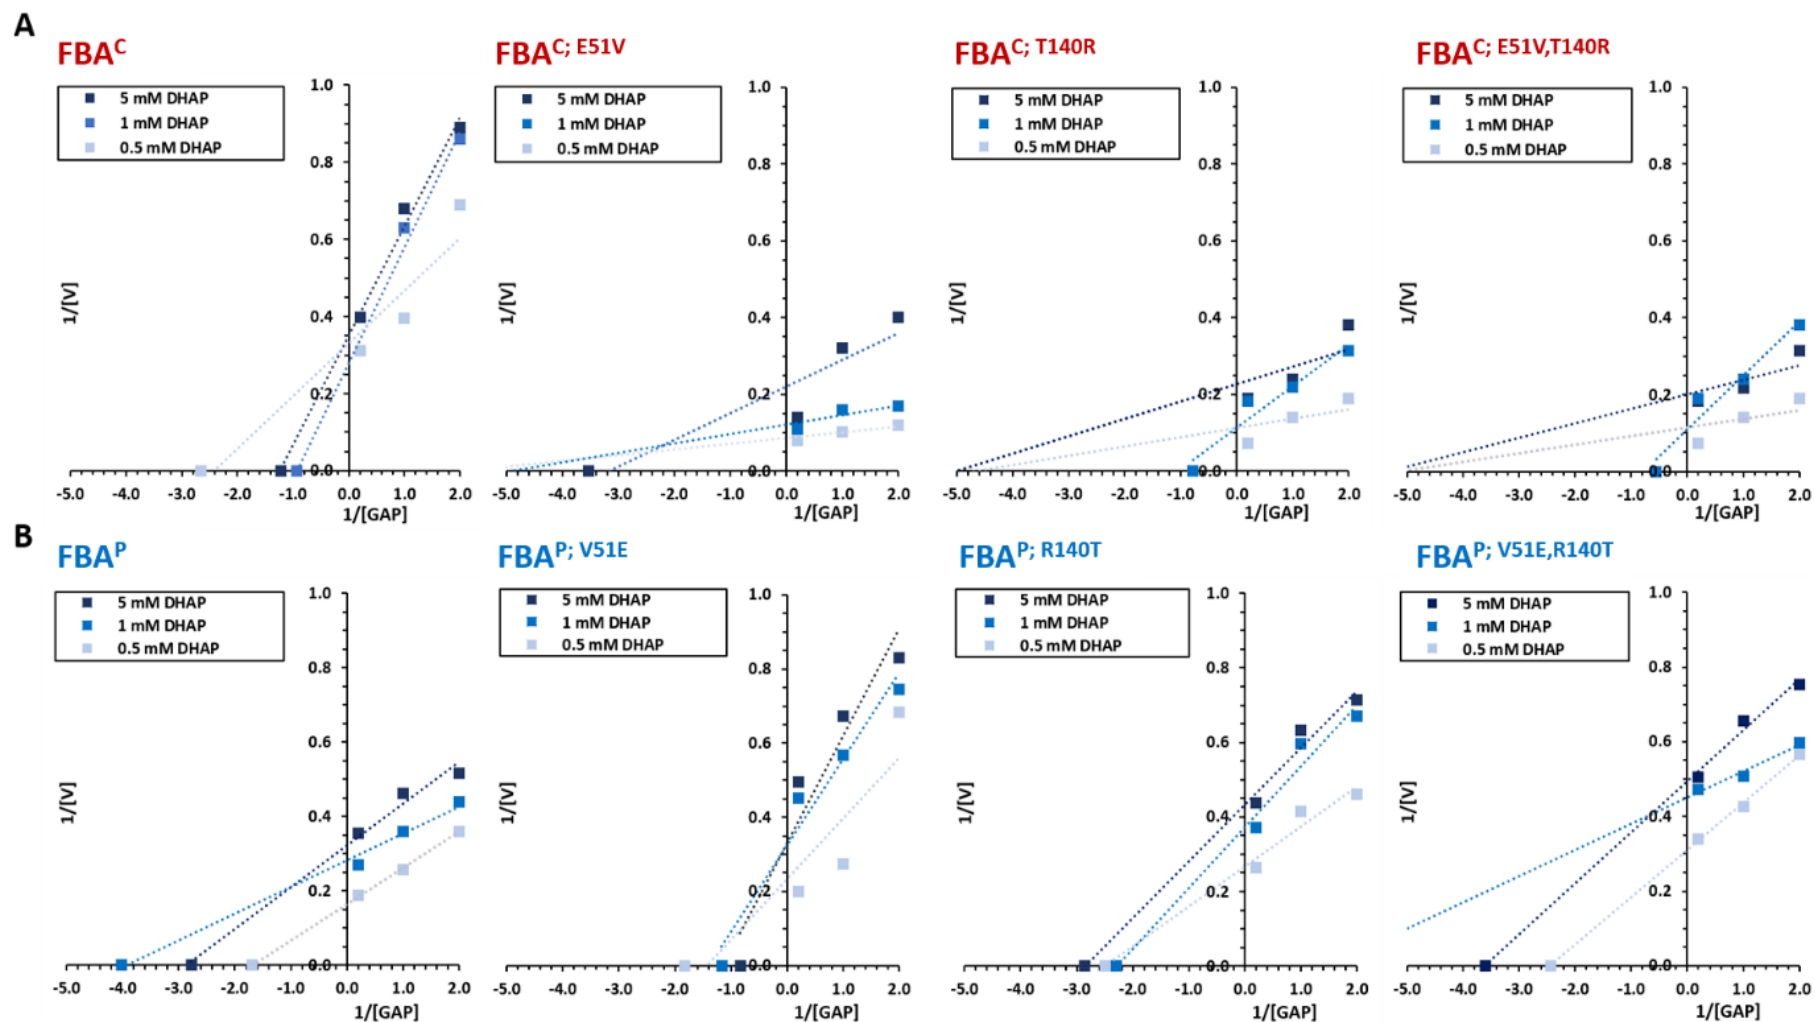

**Fig. S4: Lineweaver Burk Plots to determine  $K_M$  for distinct FBAs and mutants in gluconeogenesis (FBP synthesis) with GAP as substrate.** Asymmetric intersecting initial velocity patterns for an equilibrium-ordered mechanism. The reciprocals of the specific activity (axis of ordinate) for FBA<sup>C</sup> and SDMs (A) and FBA<sup>P</sup> and SDMs (B) were applied against the reciprocals of the GAP substrate concentration (axis of abscissa). The kinetic parameters were calculated according to Lineweaver and Burk kinetics (Lineweaver and Burk, 1934).

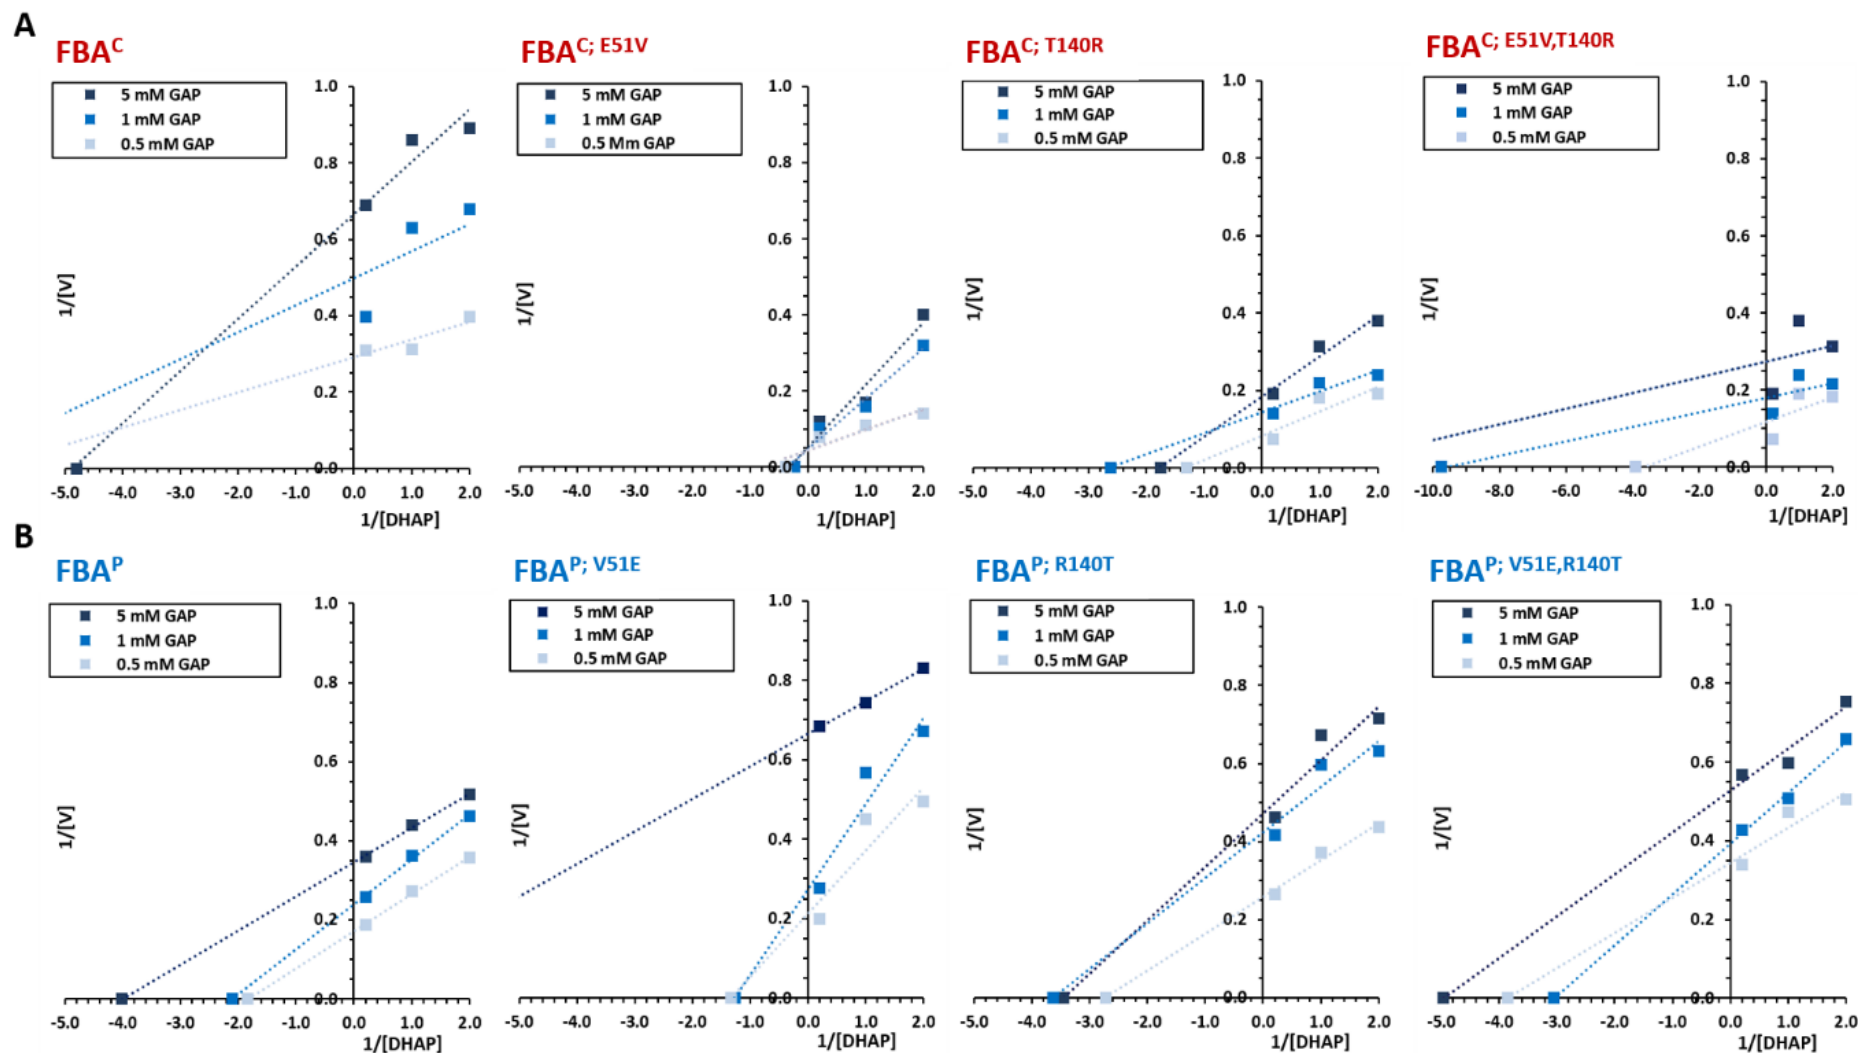

**Fig. S5: Lineweaver Burk Plots to determine  $K_M$  for distinct FBAs and mutants in gluconeogenesis (FBP synthesis) with DHAP as substrate.** Asymmetric intersecting initial velocity patterns for an equilibrium-ordered mechanism. The reciprocals of the specific activity (axis of ordinate) for FBA<sup>C</sup> and SDMs (A) and FBA<sup>P</sup> and SDMs (B) were applied against the reciprocals of the DHAP substrate concentration (axis of abscissa). The kinetic parameters were calculated according to Lineweaver and Burk kinetics (Lineweaver and Burk, 1934).
